# Supplementary material
Source: Research Square preprint supplement (doi:10.21203/rs.3.rs-9586496/v1)
Supplement: Supplementary file 1 [file cb0d68b0ad1677d21e51be25.docx]

**Supplementary Figure Legends**

**Fig. S1 Expression levels of *Il1b* and *Nlrp3* mRNA, related to Fig. 2**

BMDMs of the indicated genotypes were left unstimulated (−) or treated with Pam3CSK4 (100 ng/mL) for 6 h. RT-qPCR analyses were performed to determine mRNA expression levels of *Il1b* (**a**) and *Nlrp3* (**b**). Data were normalized to the levels of *18s* mRNA and results are shown as relative expression to the unstimulated Het BMDMs*.* Data were analyzed using two-way ANOVA followed by Tukey’s multiple comparison tests. ns, not significant. Data are shown as the mean ± SD of triplicate wells.

**Fig. S2 Expression of GSDME protein, related to Fig. 2**

BMDMs of the indicated genotypes were left unstimulated (No Stim.) or stimulated with Pam3CSK4 (P3C, 100 ng/mL) for the indicated periods. Whole cell extracts were subjected to SDS-PAGE followed by western blotting using the indicated antibodies to detect the corresponding proteins. β-Actin was used as a loading control.

**Fig. S3 Evaluation of *Casp8* knockdown in BMDMs, related to Fig. 5**

TAB2-KO BMDMs were transfected with siRNA against caspase-8 (C8), or control siRNA (Ctrl), and incubated for 24 h. RT-qPCR analysis was performed to determine mRNA expression levels of *Casp8*. Data were normalized to the levels of *18s* mRNA and results are shown as relative expression to the control siRNA-transfected BMDMs*.* Data were analyzed using one-way ANOVA followed by Tukey’s multiple comparison tests. ***, *p* < 0.001. Data are shown as the mean ± SD of triplicate wells.
